# Supplementary material for: An Oncogenic Role for Four-Jointed Box 1 (FJX1) in Nasopharyngeal Carcinoma
Source: Hindawi journal article supplement (doi:10.1155/2019/3857853), 2019-05-19

## An oncogenic role for Four-jointed Box 1 (FJX1) in nasopharyngeal carcinoma

San Jiun Chai<sup>1\*</sup>, Muhammad Mamduh Ahmad Zabidi<sup>1,4</sup>, Siew Pey Gan<sup>1</sup>, Pathmanathan Rajadurai<sup>2</sup>, Paul Vey Hong Lim<sup>3</sup>, Ching Ching Ng<sup>4</sup>, Lee Fah Yap<sup>1</sup>, Soo Hwang Teo<sup>1</sup>, Kue Peng Lim<sup>1</sup>, Vyomesh Patel<sup>1</sup>, Sok Ching Cheong<sup>1\*</sup>

### Supplementary Tables

**Supplementary Table 1.** STR profile of TW04 with a match of  $\geq 80.0\%$  to HeLa D98-AH2 clone.

| Type                 | Test Sample | Closest Match |
|----------------------|-------------|---------------|
| Cell Line            | TW04        | D98-AH2       |
| Database             | -           | DSMZ          |
| TH01                 | 6,7,9       | 7             |
| D21S11               | 27,30       | N/A           |
| D5S818               | 11,12       | 11,12         |
| D13S317              | 10,12       | N/A           |
| D7S820               | 10,12       | 12            |
| D16S539              | 9,10        | 9,10          |
| CSF1PO               | 10,11       | 9,10,11       |
| Amelogenin           | X           | X             |
| vWA                  | 14,16       | 16,18         |
| TPOX                 | 8,12        | 8,12          |
| Match to Test Sample |             | 80.00%        |

**Supplementary Table 2.** Histological characteristics of non-malignant nasopharyngeal tissue samples.

| Sample | Histology                               |
|--------|-----------------------------------------|
| NP 3   | Nasopolyps                              |
| NP 4   | Nasopharyngitis                         |
| NP 5   | Normal epithelium                       |
| NP 6   | Synovial sarcoma                        |
| NP 7   | Nasopharyngitis                         |
| NP 8   | Nasopharyngitis                         |
| NP 9   | Nasopharyngitis                         |
| NP 10  | Nasopharyngitis                         |
| NP 11  | Adenoid                                 |
| NP 12  | Nasopharyngitis                         |
| NP 13  | Lymphoid hyperplasia and rhinosinusitis |

**Supplementary Table 3.** Correlation between FJX1 expression and clinicopathological characteristics of NPC tissue samples.

| Characteristics   | FJX1 expression | <i>p</i> -value |
|-------------------|-----------------|-----------------|
| <i>T category</i> |                 |                 |
| T1                | 3/6 (50%)       | 0.948           |
| T2                | 8/19 (42%)      |                 |
| T3                | 4/12 (33%)      |                 |
| T4                | 3/6 (50%)       |                 |
| <i>N category</i> |                 |                 |
| N0                | 5/12 (42%)      | 0.841           |
| N1                | 4/6 (67%)       |                 |
| N2                | 9/23 (39%)      |                 |
| N3                | 0/2 (0%)        |                 |
| <i>Stage</i>      |                 |                 |
| I                 | 2/3 (67%)       | 0.526           |
| II                | 4/7 (57%)       |                 |
| III               | 9/24 (38%)      |                 |
| IV                | 3/9 (33%)       |                 |

## Supplementary Figure Legends

**Figure S1.** Transcriptomic levels of FJX1 in cancer. (a) Previous microarray analysis (GSE13597) showed that the mRNA level of FJX1 transcript is increased in NPC biopsies and NPC cell lines compared to normal nasopharynx tissue, suggesting FJX1 as a potential biomarker for NPC. (b) FJX1 mRNA levels also reported being elevated in head and neck cancer patients when comparing RNAseq data of 43 cancer tissues with matched normal samples from the TCGA database.

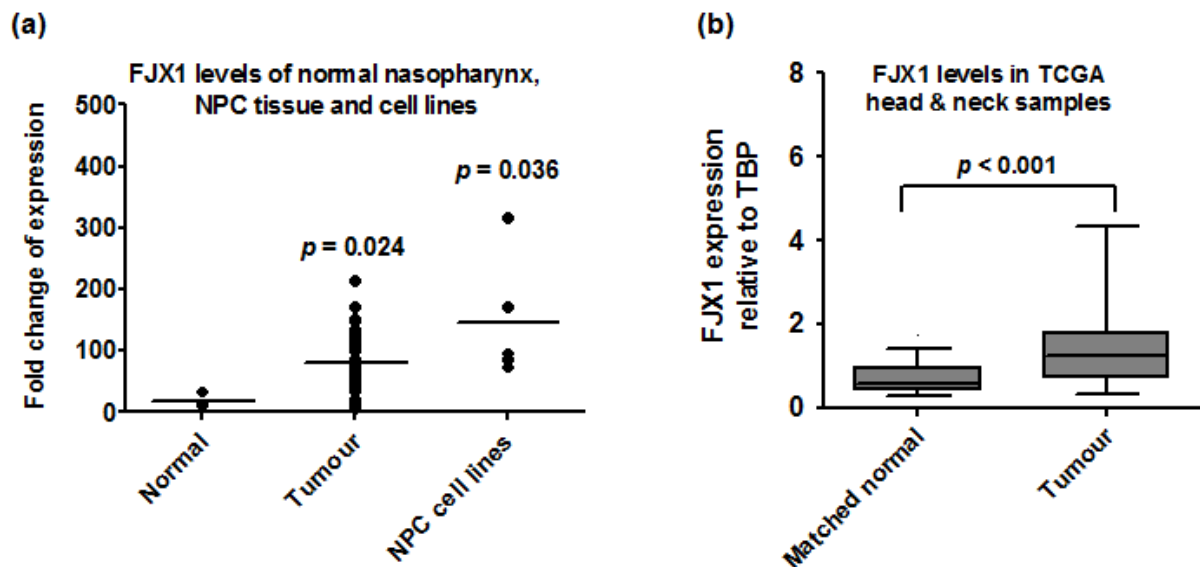

**Figure S2.** FJX1:V5 overexpression in HeLa/T cell was confirmed using V5 antibody. Three bands with different molecular weight of FJX1 protein in was detected in Western blotting.

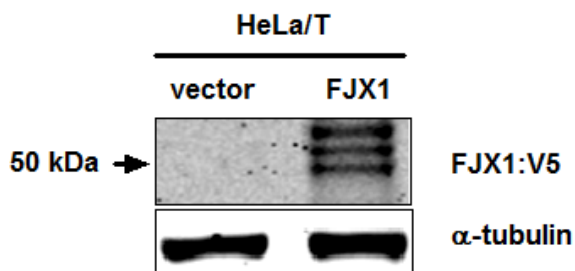

Supplement: f1 [file 3857853.f1.pdf]
